# Supplementary material
Source: PubMed Central journal article supplement (PMC6125177)
Supplement: NIHMS979938-supplement-4.pdf [file NIHMS979938-supplement-4.pdf]

Figure S1

**A**

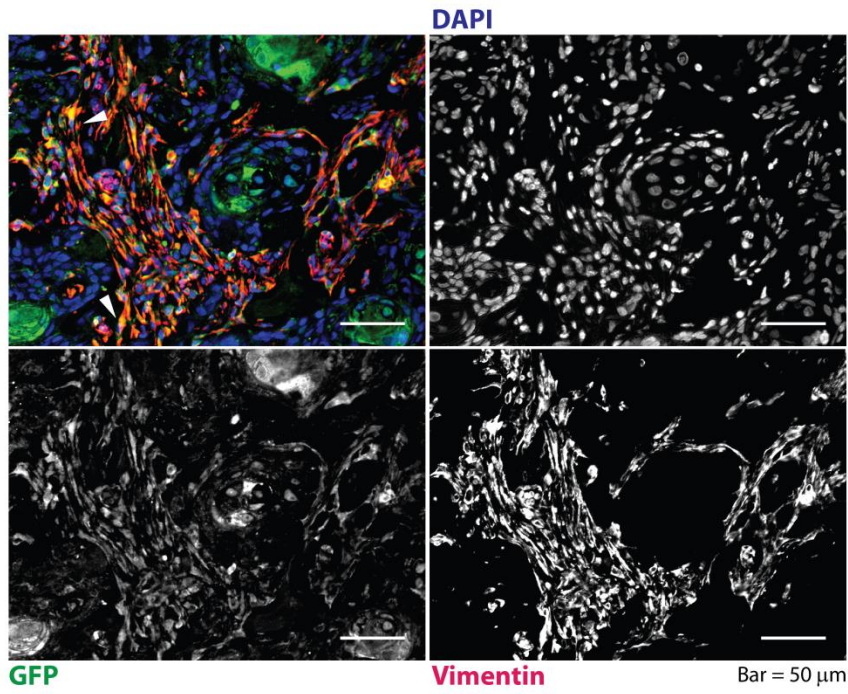

**B**

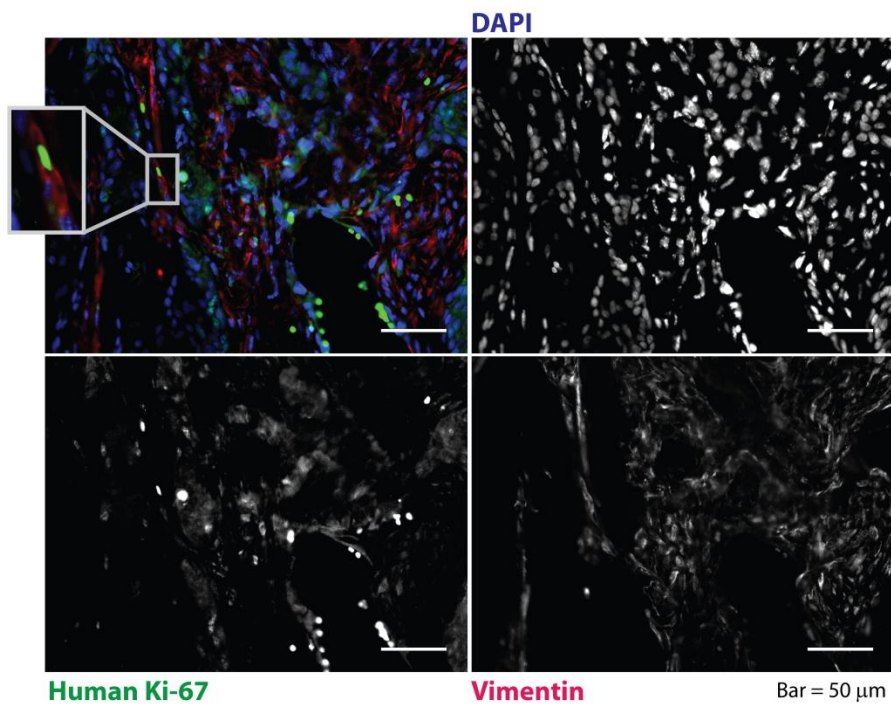

**Figure S1: Human CAFs persist within the subcutaneous xenograft tumors.** Related to Figure 1.

Representative images of TE11+FEF3303 co-implanted tumors co-stained for DAPI, vimentin, and GFP (A) or human Ki-67 (B) by immunofluorescence.

**Figure S2**

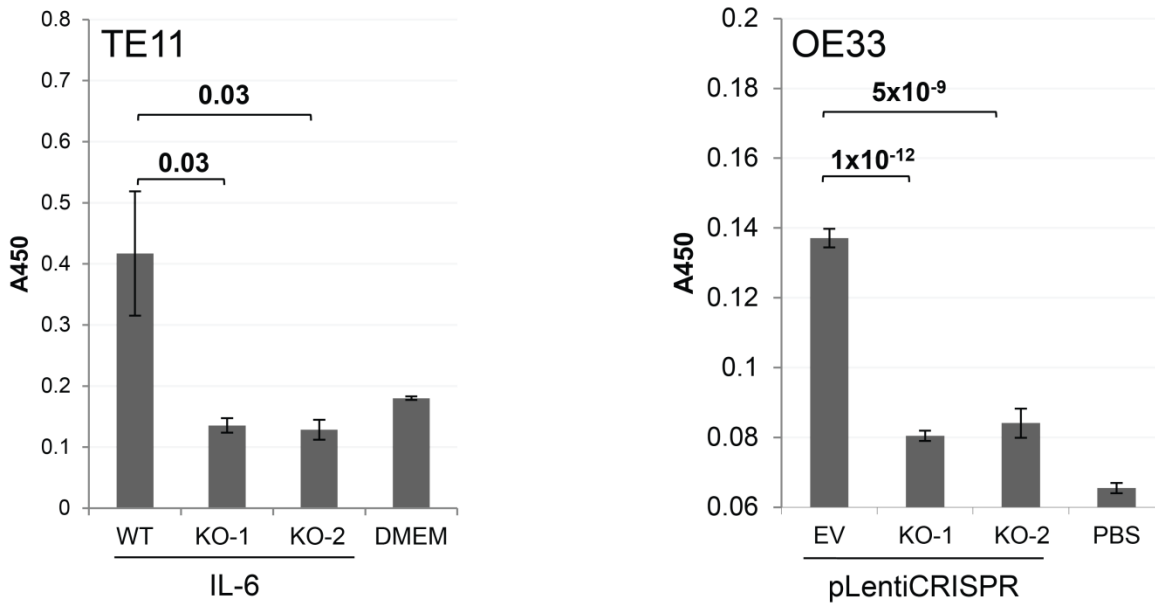

**Figure S2: Quality-control of the IL-6-knockout subclones of TE11 ESCC cell line and OE33 EAC cell line. Related to Figure 3.**

Levels of IL-6 in cell culture conditioned media were measured by ELISA and compared to wild-type (TE11) or empty-vector control (OE33) conditioned media, as well as to DMEM (TE11) or PBS (OE33) (negative control). Results shown are for the subclones at passage 3 post-transfection with the CRISPR/Cas9 construct. The stability of knockout was confirmed by ELISA for up to passage 12 post-transfection.

## Figure S3

A

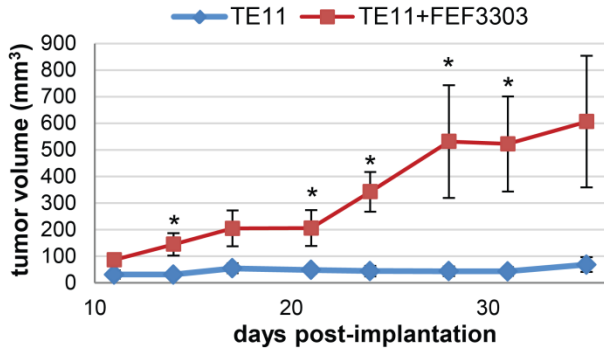

B

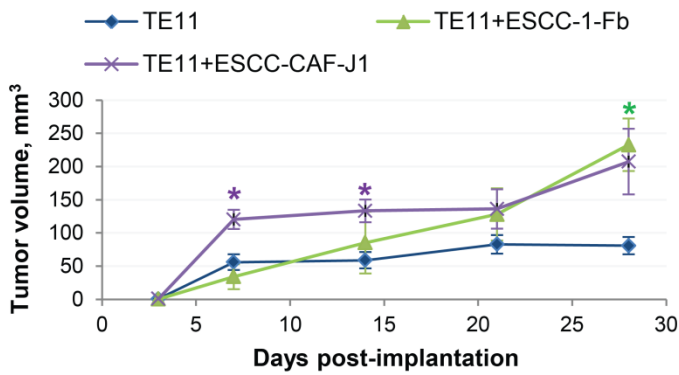

**Figure S3: Co-implantation TE11 cells with CAFs enhances growth of ESCC xenografts.** Related to Figure 1.

(A) Growth kinetics of subcutaneous xenograft tumors formed by TE11 cells alone or co-injected with FEF3303 fibroblasts (n=4; \*p<0.05). (B) Growth kinetics of subcutaneous xenograft tumors formed by TE11 cells alone or co-injected with two ESCC CAF cell lines, ESCC-1-Fb or ESCC-CAF-J1 (n=4 (TE11 mono) or 8 (TE11+CAF); \*p<0.05).

**Figure S4**

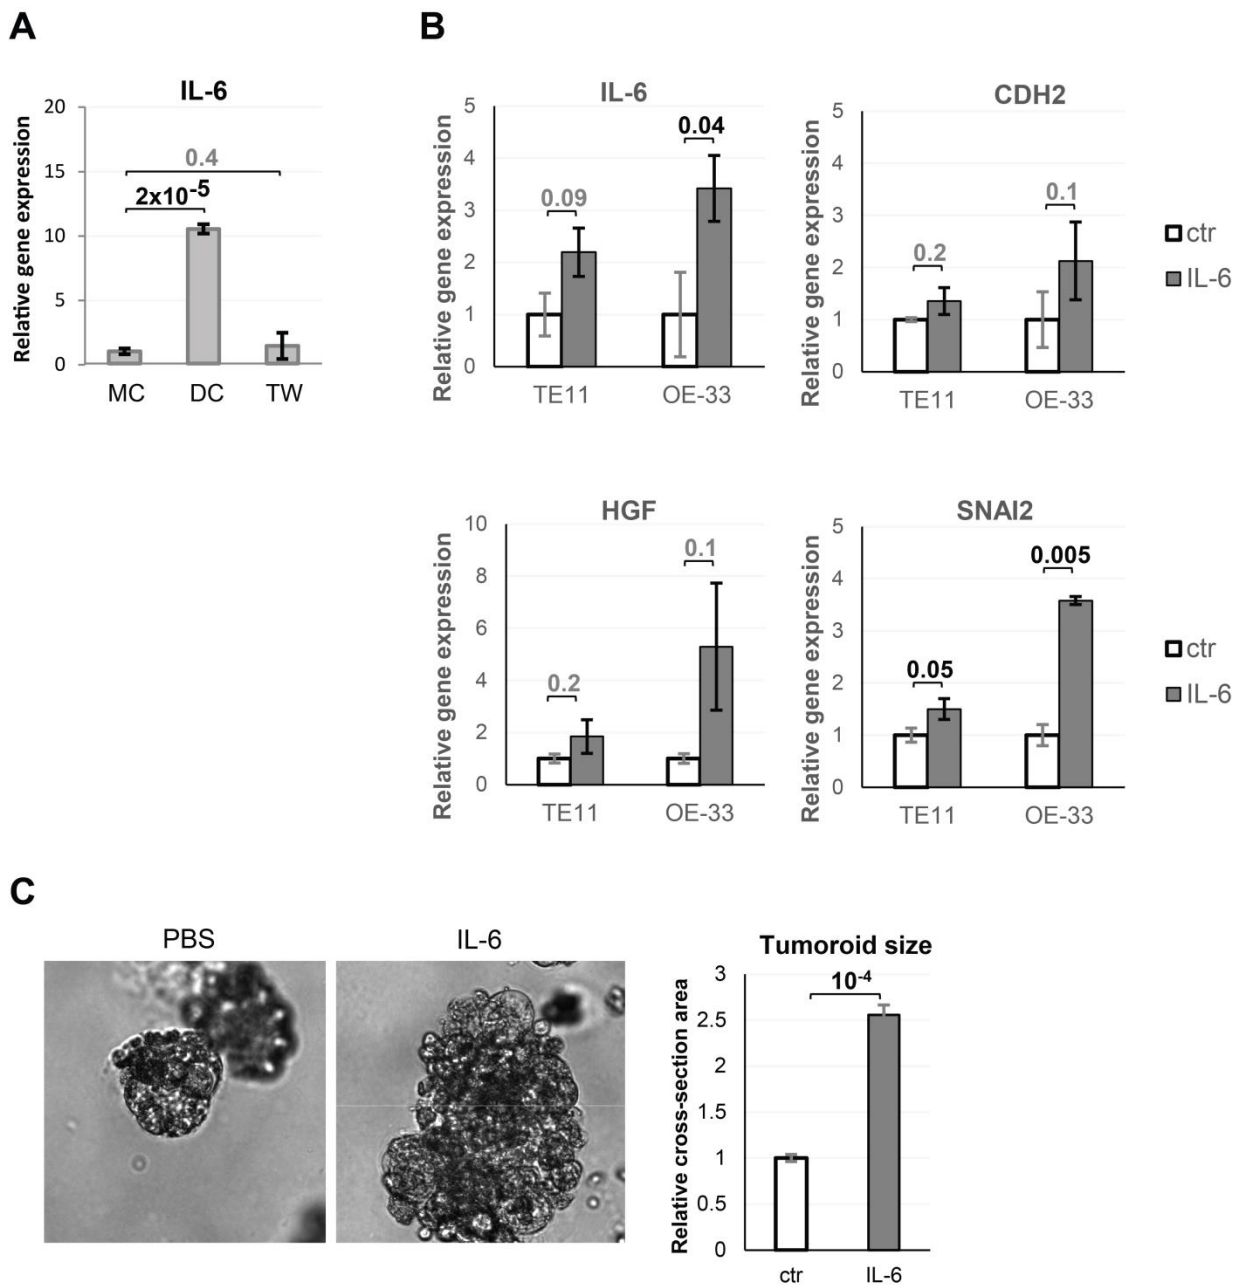

**Figure S4: IL-6 is a mediator of the interaction between tumor cells and CAFs in esophageal cancer.** Related to Figure 2.

(A) qPCR analysis of IL-6 gene expression in TE11 cells in mono-culture (MC), compared to either direct co-culture (DC) or transwell co-culture (TW) ( $n=3$ /cohort). (B) qPCR analysis of gene expression in ESCC or EAC 3D tumoroids (TE11 or OE-33, respectively), treated with either recombinant human IL-6 or PBS (ctr=control) ( $n=2$ /cohort; results of one of 2 independent experiments are shown). (C) Representative brightfield images of 3D tumoroids formed from OE-33 cells, treated with either recombinant human IL-6 or PBS (ctr). Tumoroid size is quantified as relative cross-sectional area; tumoroid shape quantified as deviation from elliptical shape ( $n=2$ /cohort; results of one of two independent experiments are shown).

**Figure S5**

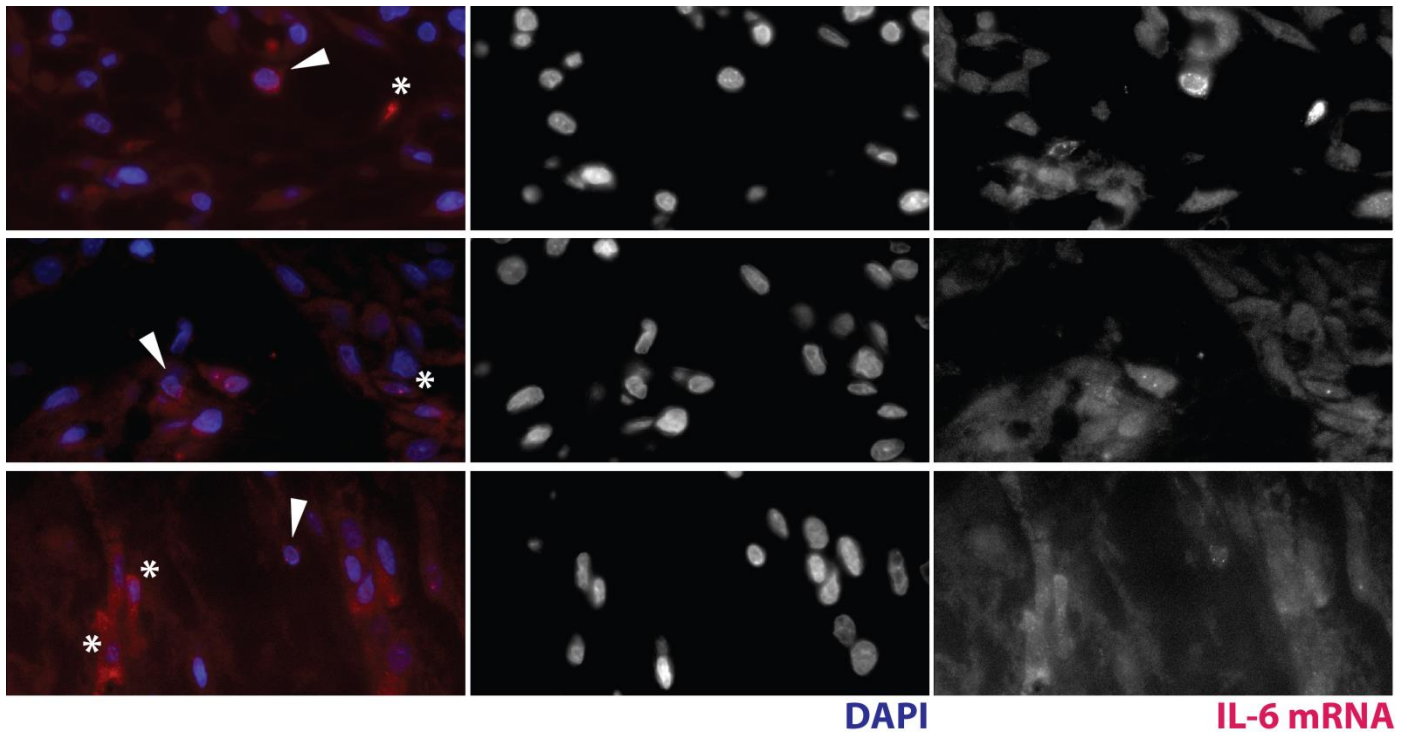

**Figure S5: IL-6 is produced by both tumor cells and CAFs in patient tissue.** Related to Figure 2.

Tissue section from an ESCC patient was stained for IL-6 mRNA by fluorescent *in situ* hybridization (FISH). Arrowheads indicate IL-6<sup>+</sup> tumor cells, asterisks – fibroblasts.

**Figure S6**

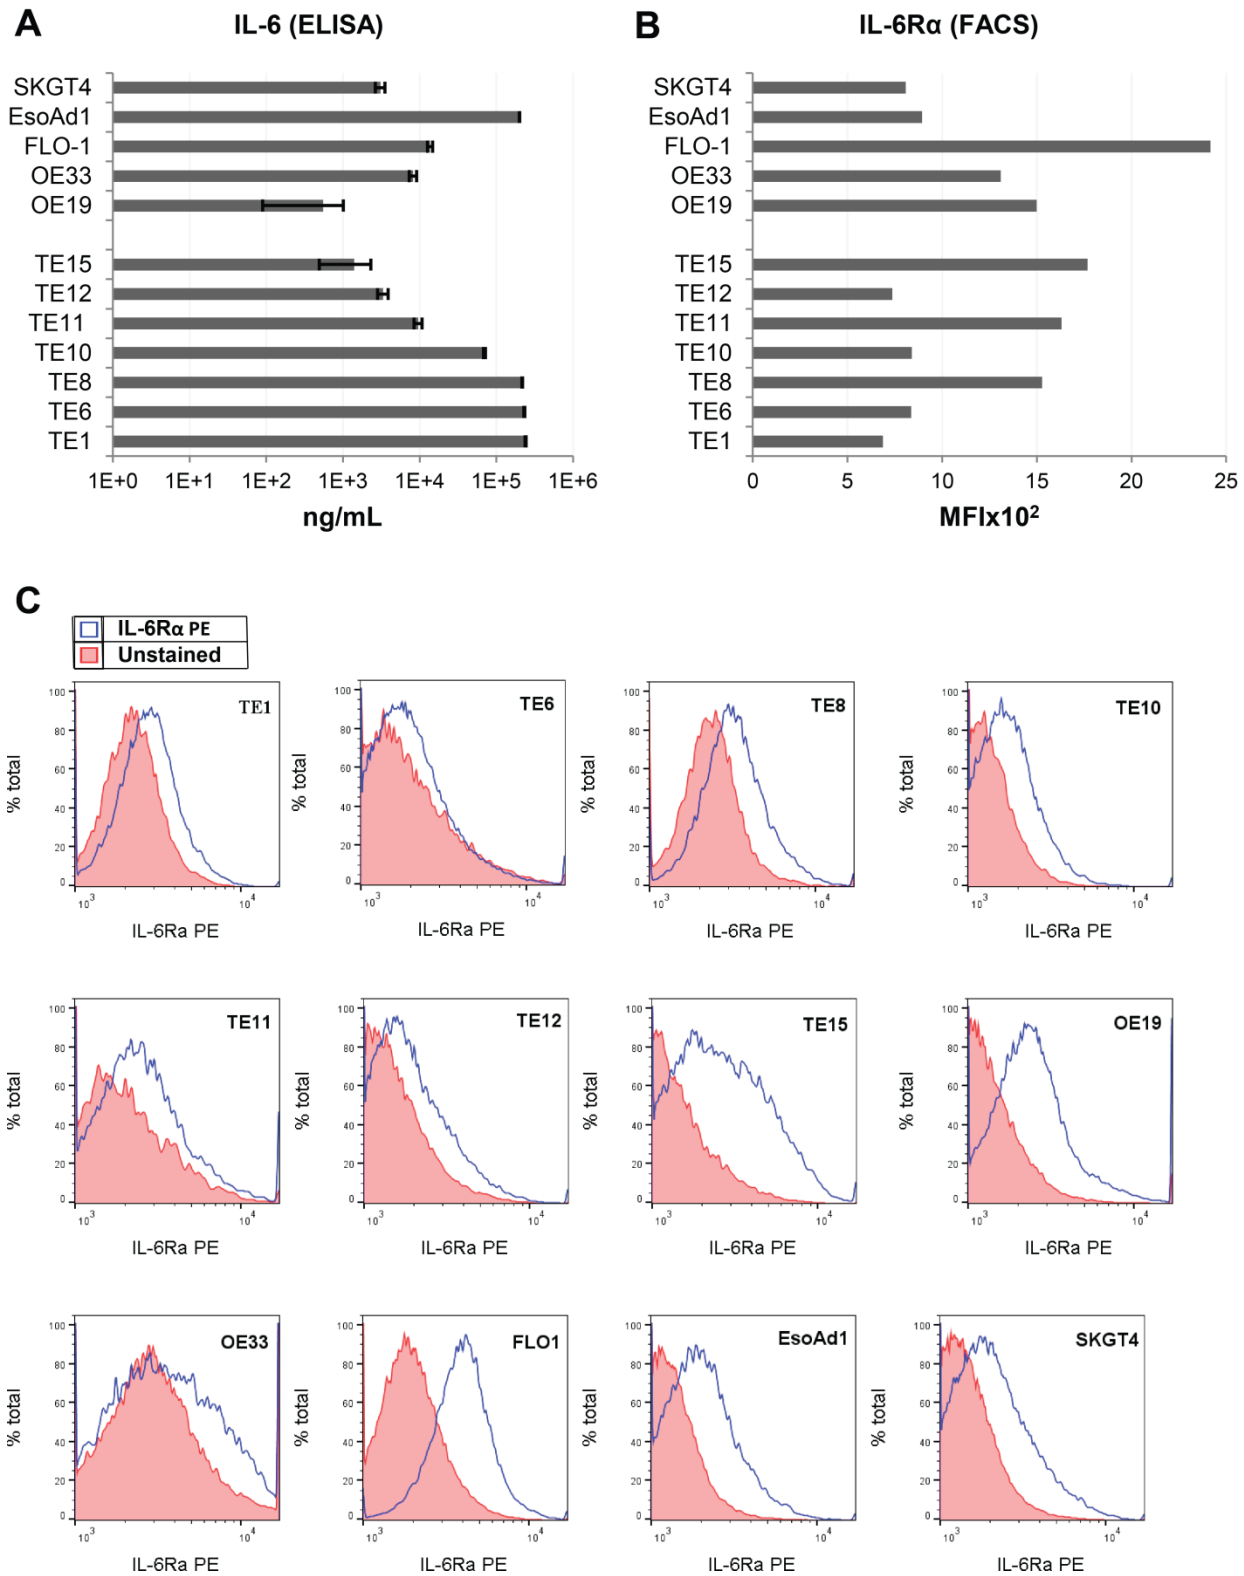

**Figure S6: IL-6 and IL-6R $\alpha$  are expressed by ESCC and EAC cell lines.** Related to Figure 2.

(A) Secretion levels of IL-6, measured by ELISA. (B,C) Cell surface levels of IL-6R $\alpha$ , measured by FACS.

## Figure S7

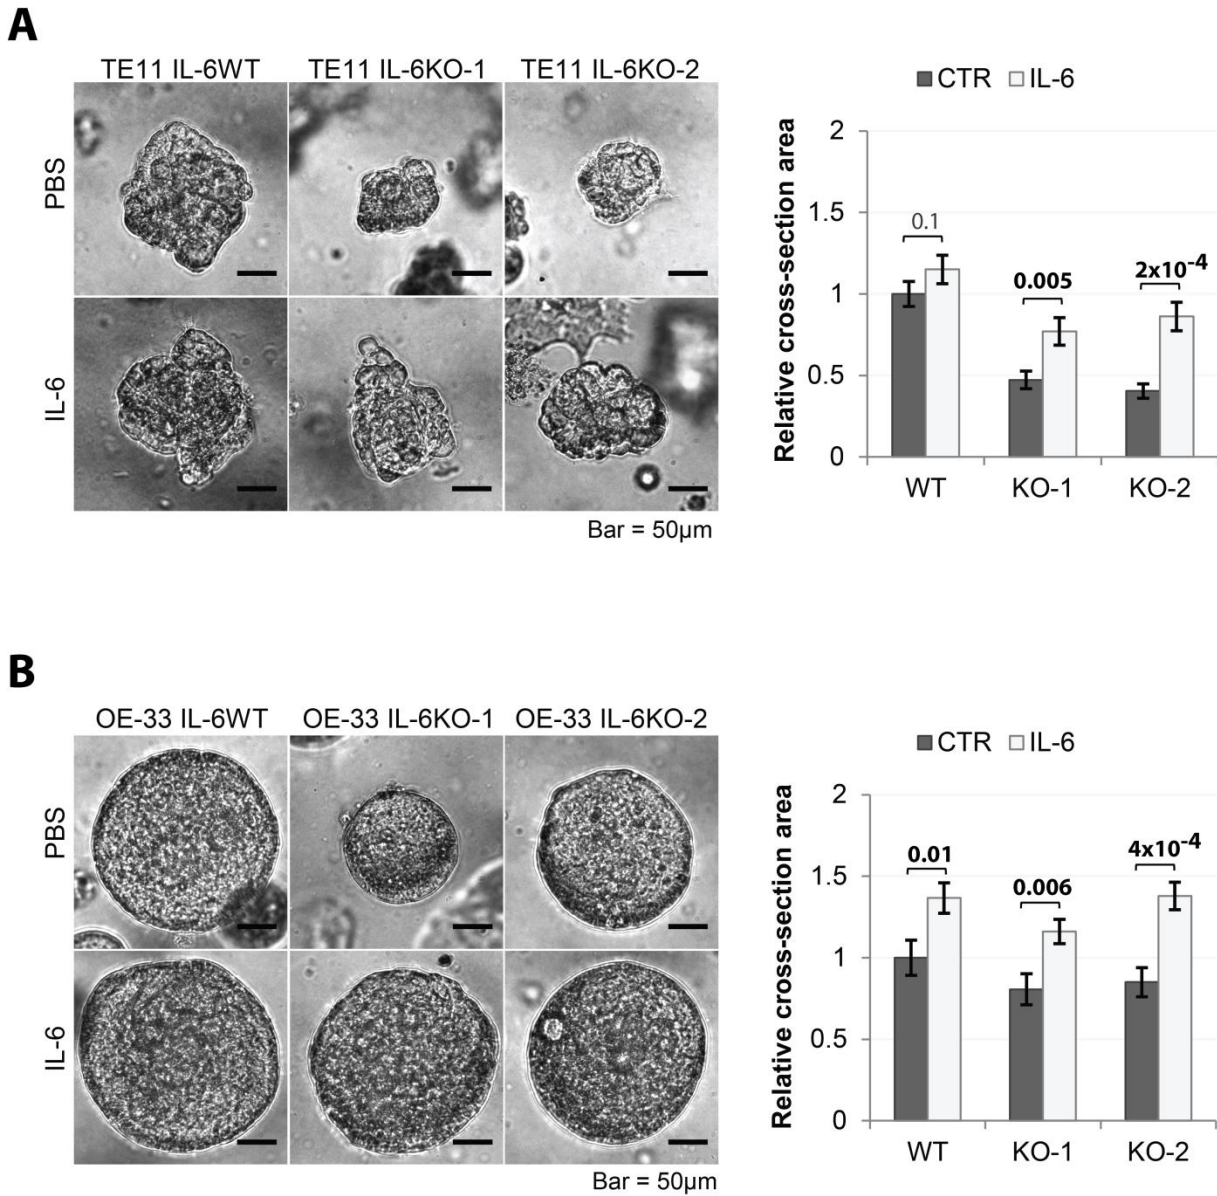

**Figure S7: Exogenous IL-6 rescues reduced growth in IL-6 deficient esophageal cancer tumoroids.** Related to Figure 3.

Brightfield images of 3D tumoroids from TE11 (A) and OE-33 (B) cell lines treated with either recombinant human IL-6 or PBS. The histograms depict average tumoroid size ( $\pm$  SEM), quantified as relative cross-sectional area ( $n=3$ /condition).

**Figure S8**

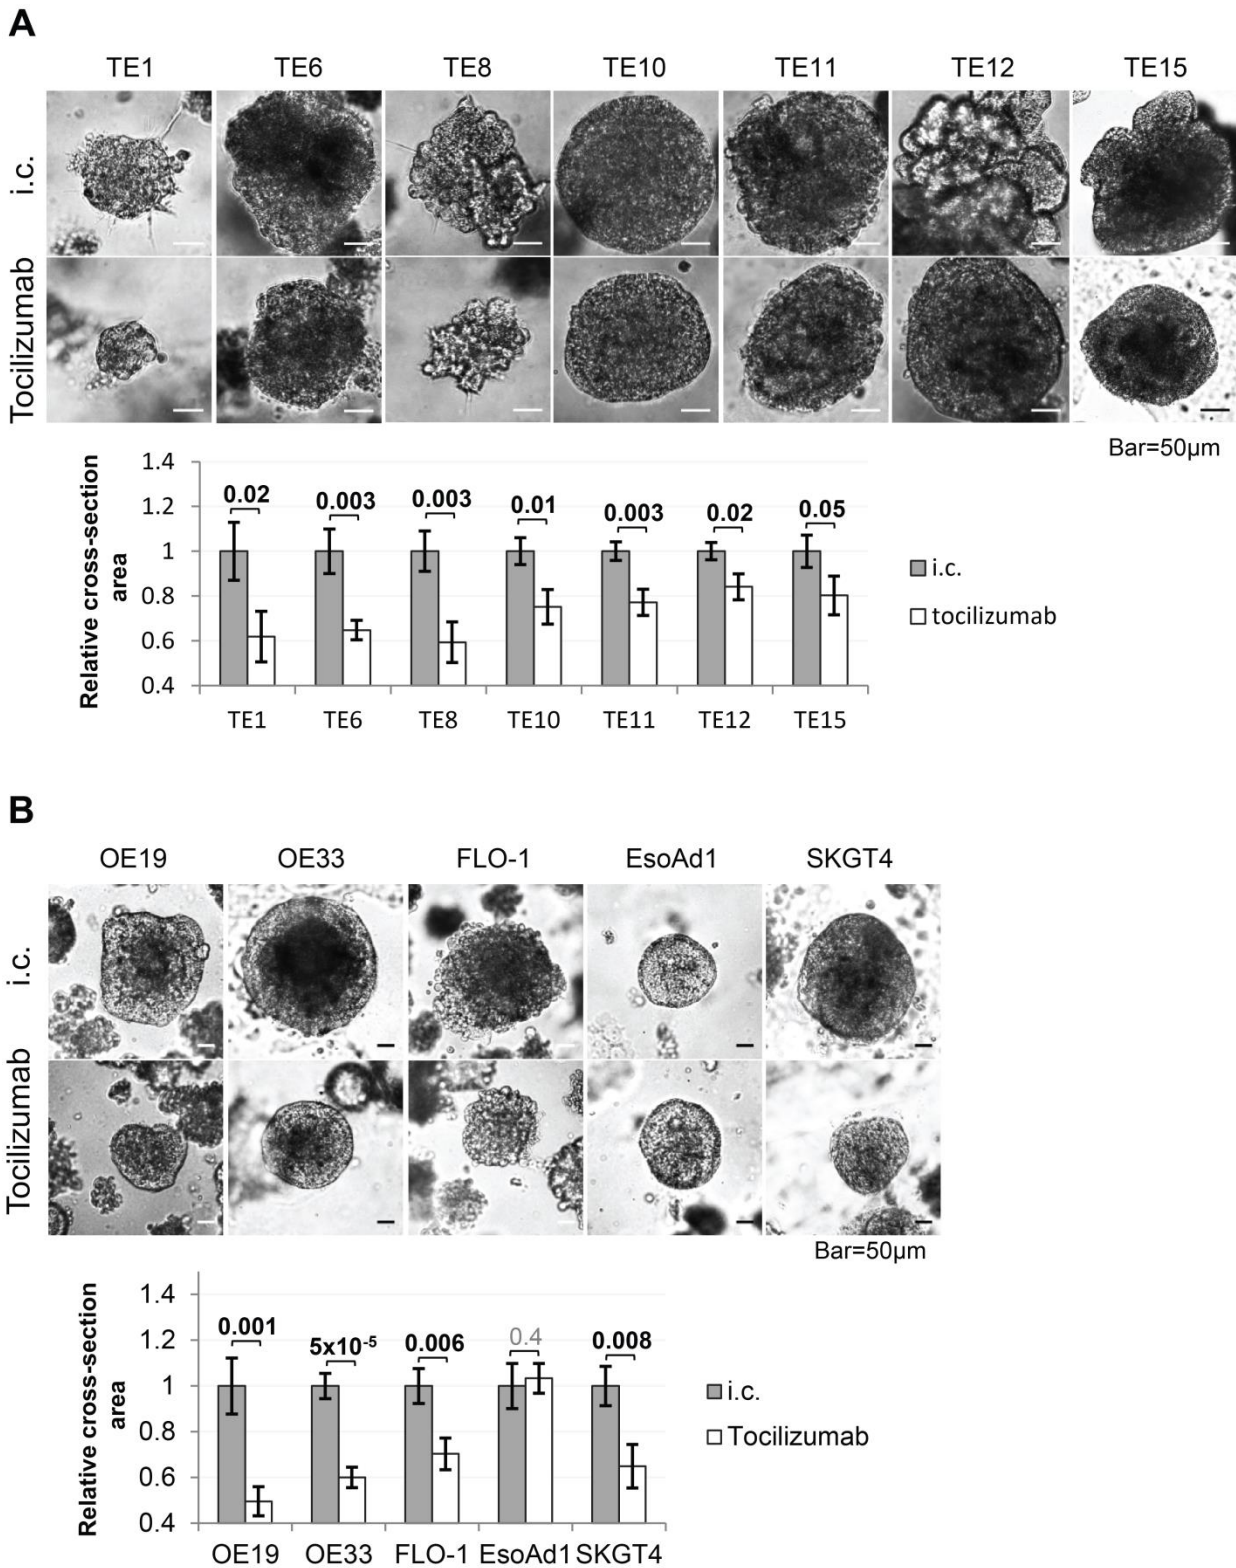

**Figure S8: Tocilizumab treatment results in reduced growth of ESCC and EAC tumoroids.** Related to Figure 4.

Brightfield images of 3D tumoroids from ESCC (A) and EAC (B) cell lines treated with either tocilizumab or isotype control (i.c.) antibody. The histograms depict average tumoroid size ( $\pm$  SEM), quantified as relative cross-sectional area.



**Figure S9**

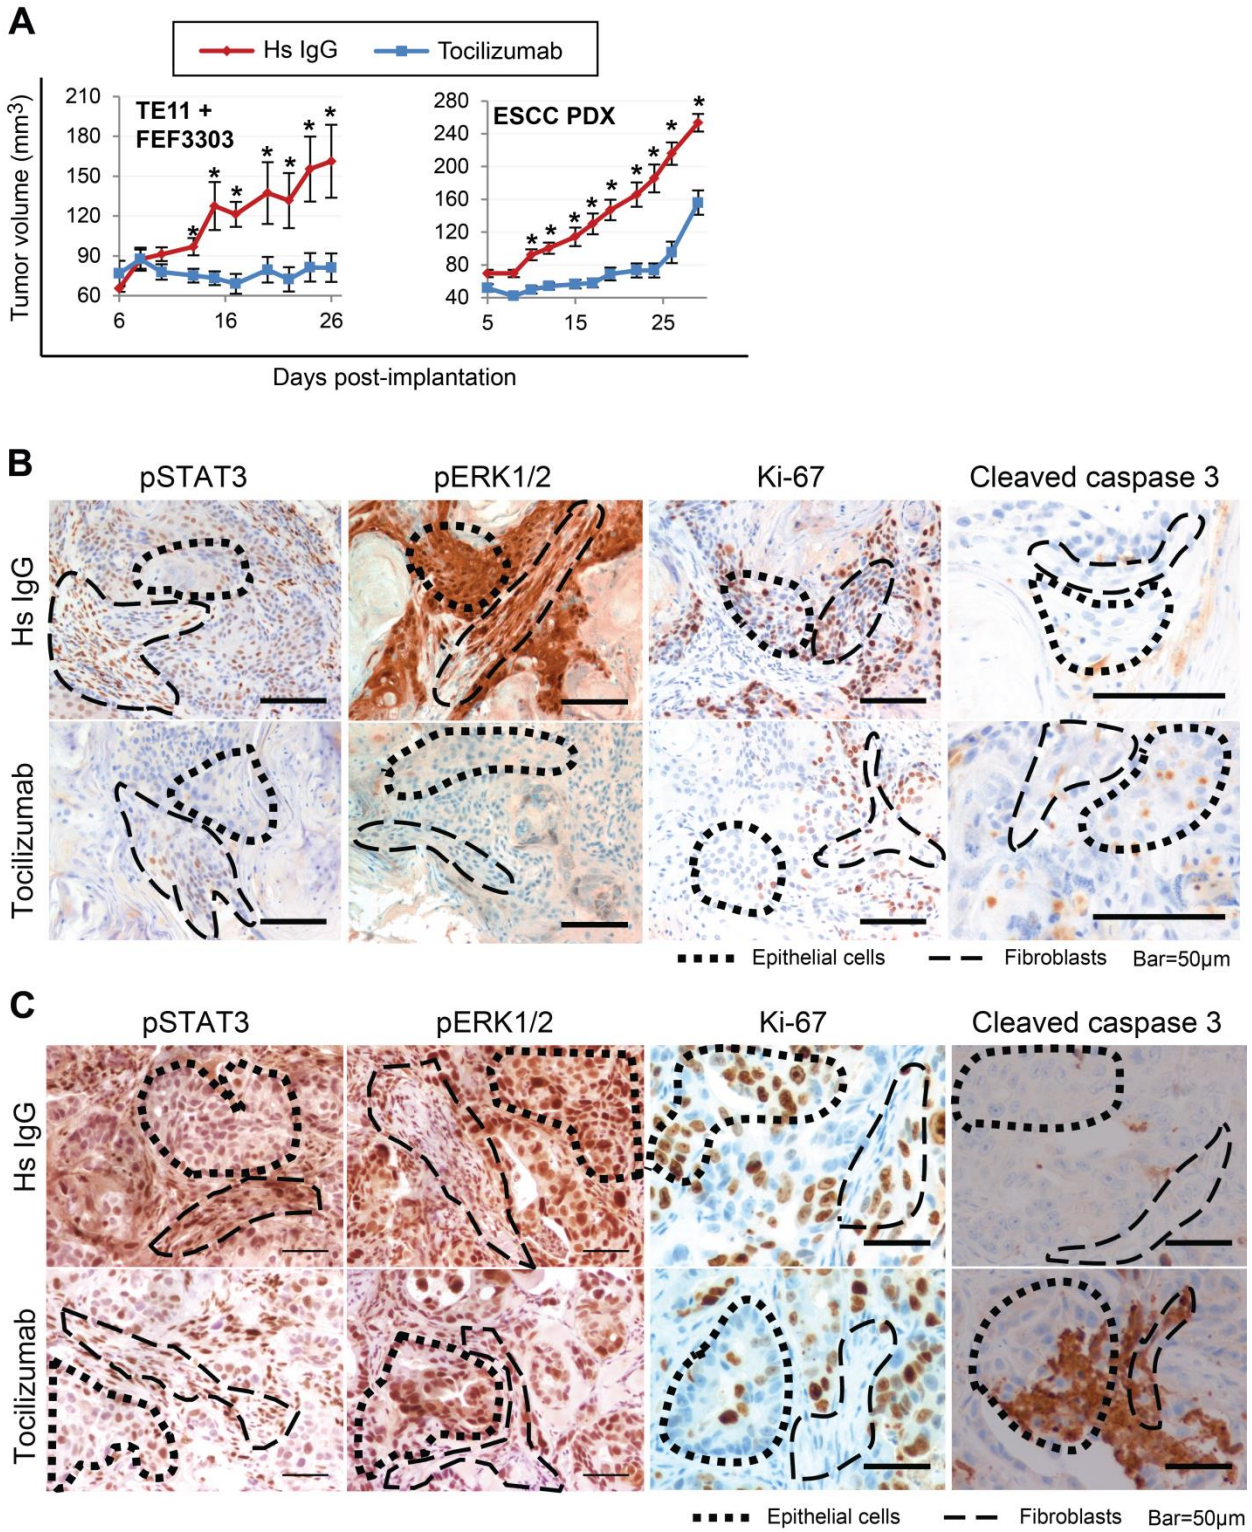

**Figure S9**

**D**

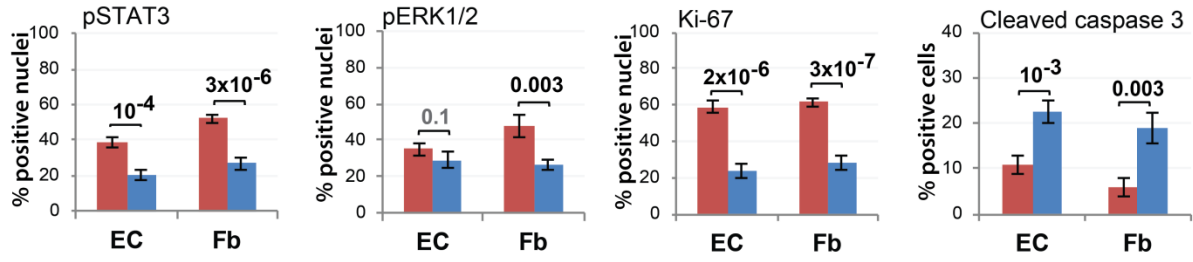

**E**

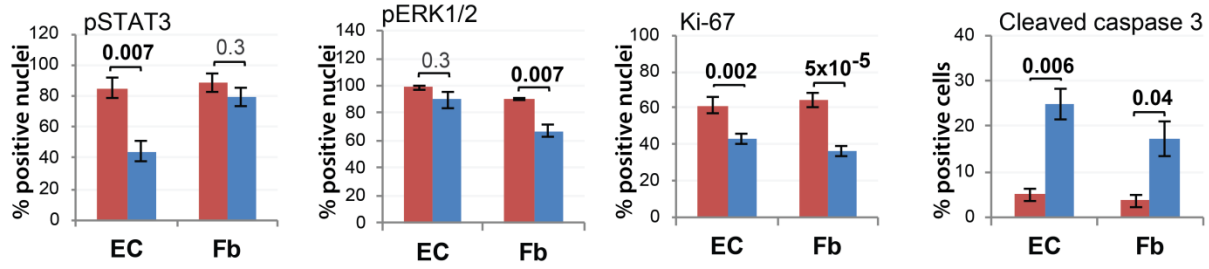

EC = epithelial cells    Fb = fibroblasts    ■ Hs IgG    ■ Tocilizumab

Figure S9

F

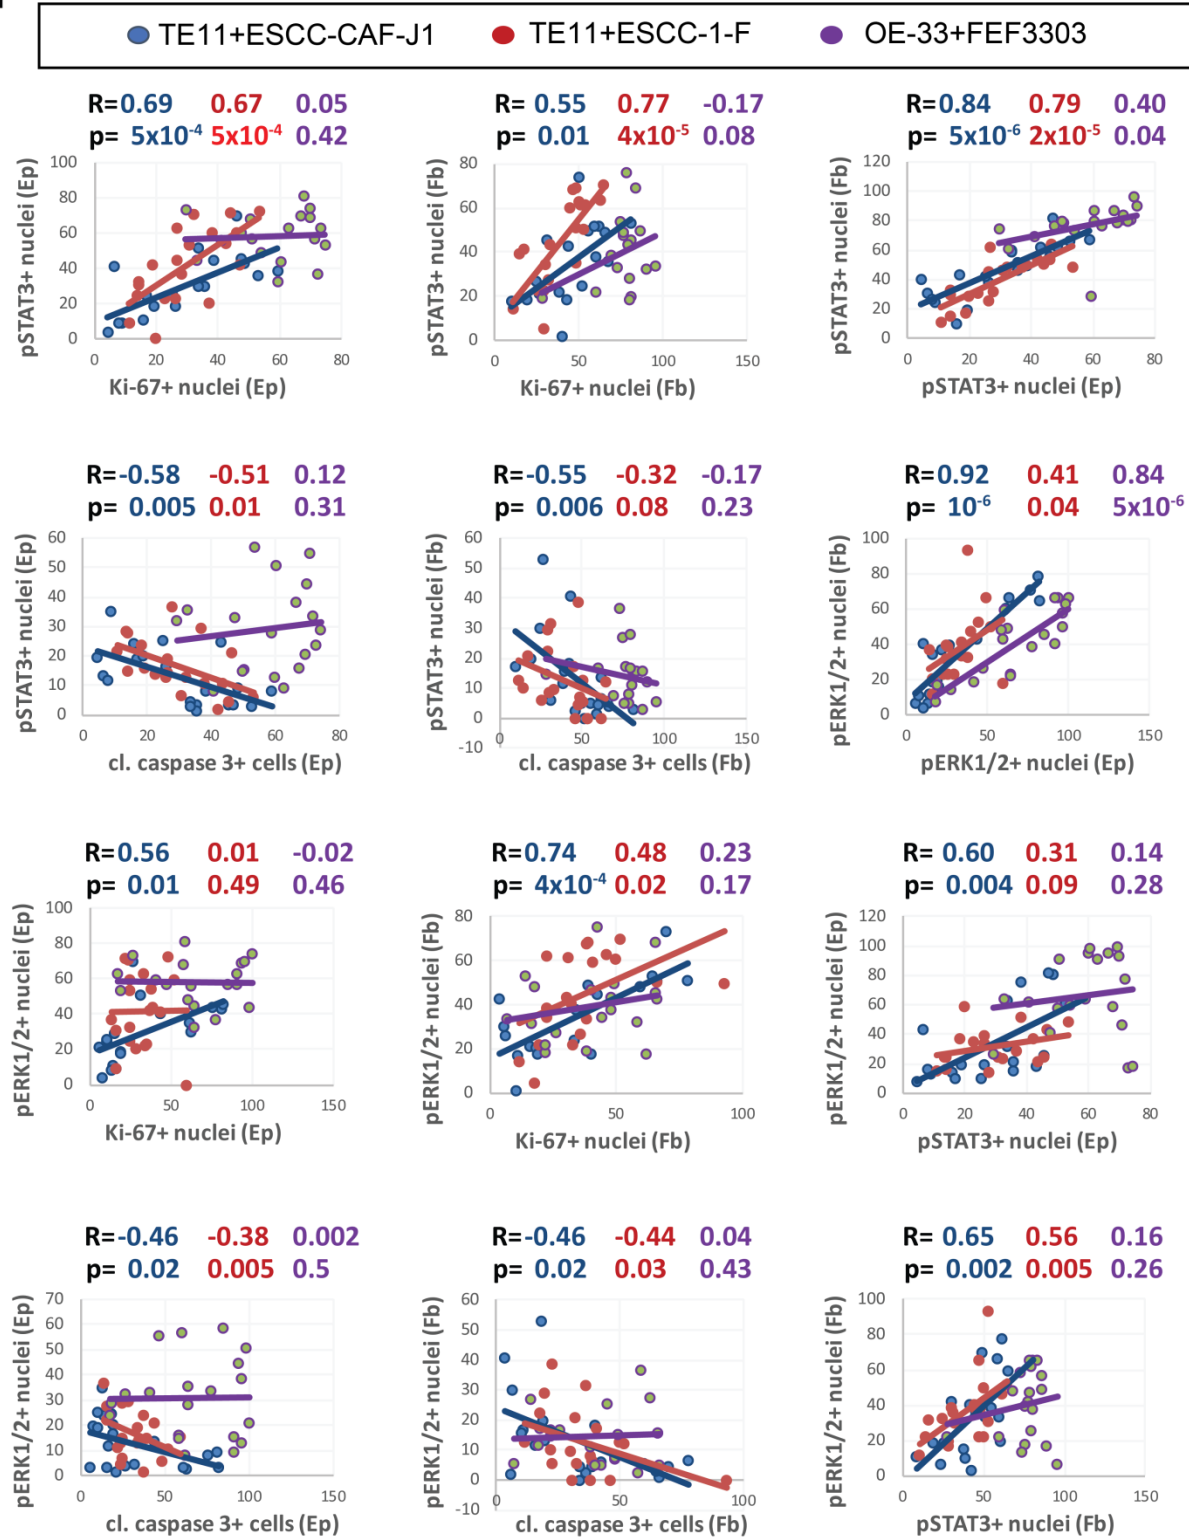

**Figure S9: Tocilizumab treatment results in histological changes.** Related to Figure 4.

(A) Growth kinetics of subcutaneous ESCC (TE11+FEF3303) xenograft tumors and ESCC PDX-1 tumors treated with Tocilizumab or isotype control (i.c.) antibody (n=10/cohort, \*p≤0.01). (B) Representative images of TE11+ESCC-CAF-J1 tumor sections stained (IHC) for pSTAT3, pERK1/2, Ki-67 and cleaved caspase 3, with outlined examples of epithelial cells (dotted line) and fibroblasts (dashed line). (C) Representative images of OE-33+FEF3303 tumor sections stained (IHC) for pSTAT3, pERK1/2, Ki-67 and cleaved caspase 3, with outlined examples of epithelial cells (dotted line) and fibroblasts (dashed line). Quantification of IHC staining for pSTAT3, pERK1/2, Ki-67 and cleaved caspase 3 of TE11+ESCC-1-F and TE11+FEF3303 tumors is presented in panels (D) and (E), respectively. (F) Correlation analysis of activation of STAT3 or ERK1/2 and downstream targets (Ki-67, cleaved caspase 3). Correlation coefficients (R) and p-values are listed above corresponding graphs.

# Figure S10

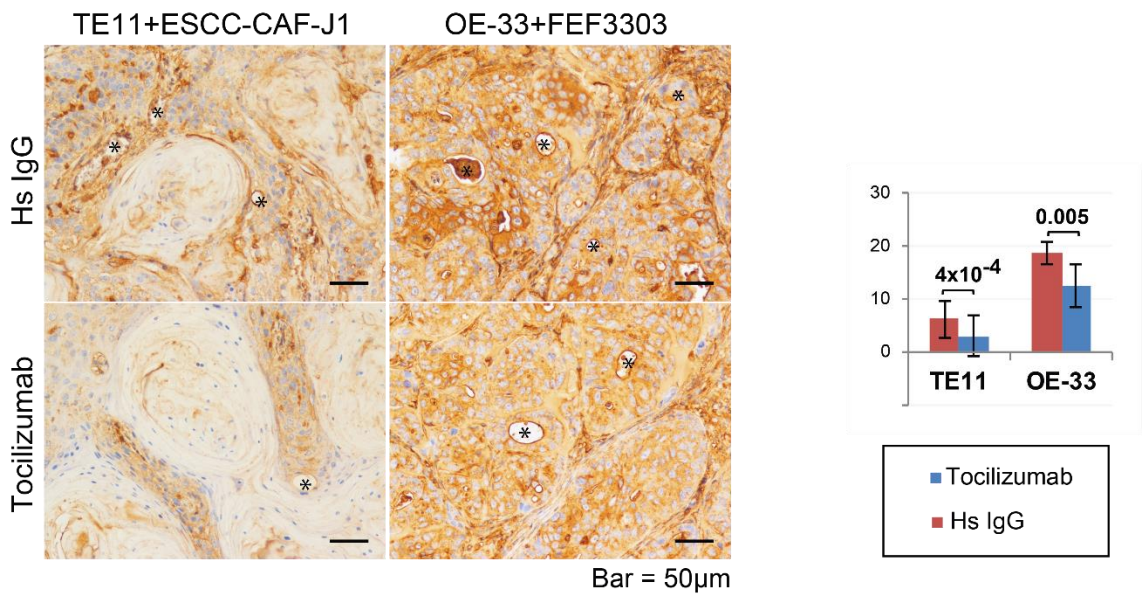

**Figure S10: Tocilizumab treatment reduces angiogenesis.** Related to Figure 4.

To visualize the endothelium, histological sections of xenograft tumors were stained with Lycopersicon Esculentum (Tomato) Lectin (Vector Labs). Number of open blood vessels (\*) per high-power field was used to quantify angiogenesis.

## Figure S11

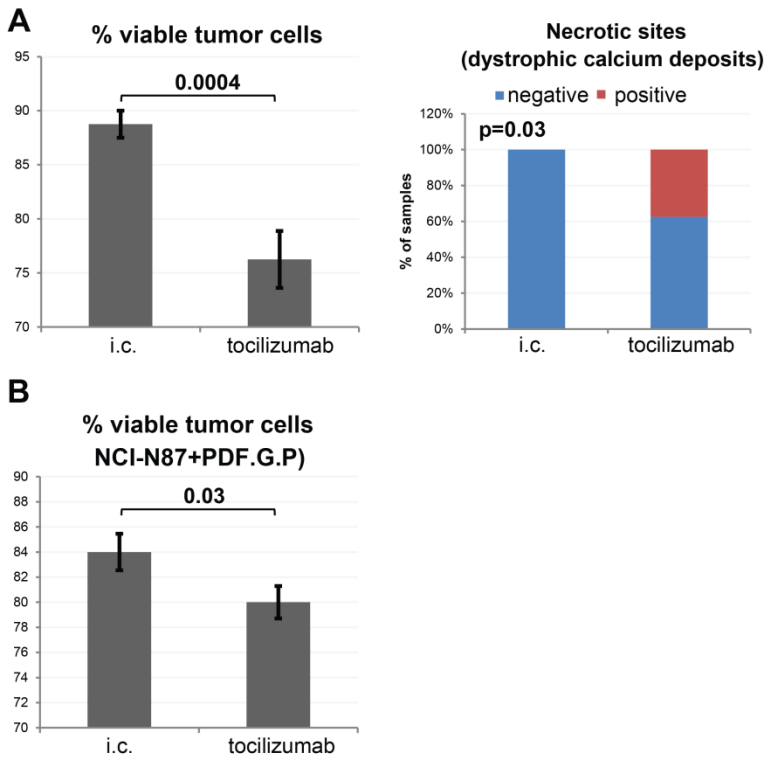

**Figure S11: Tocilizumab treatment results in histological changes.** Related to Figure 6.

(A) Quantification (based on H&E staining) of the frequency of viable tumor cells and amount of necrosis (presented as dystrophic calcium deposits) within LNT14 PDX tumors, treated with isotype control antibody (i.c.) or tocilizumab (n=8/each cohort). (B) Quantification (based on H&E staining) of the frequency of viable tumor within NCI-N87+PDF.G.P xenograft tumors, treated with isotype control antibody (i.c.) or tocilizumab (n=6/i.c. or 8/tocilizumab cohort).

Figure S12

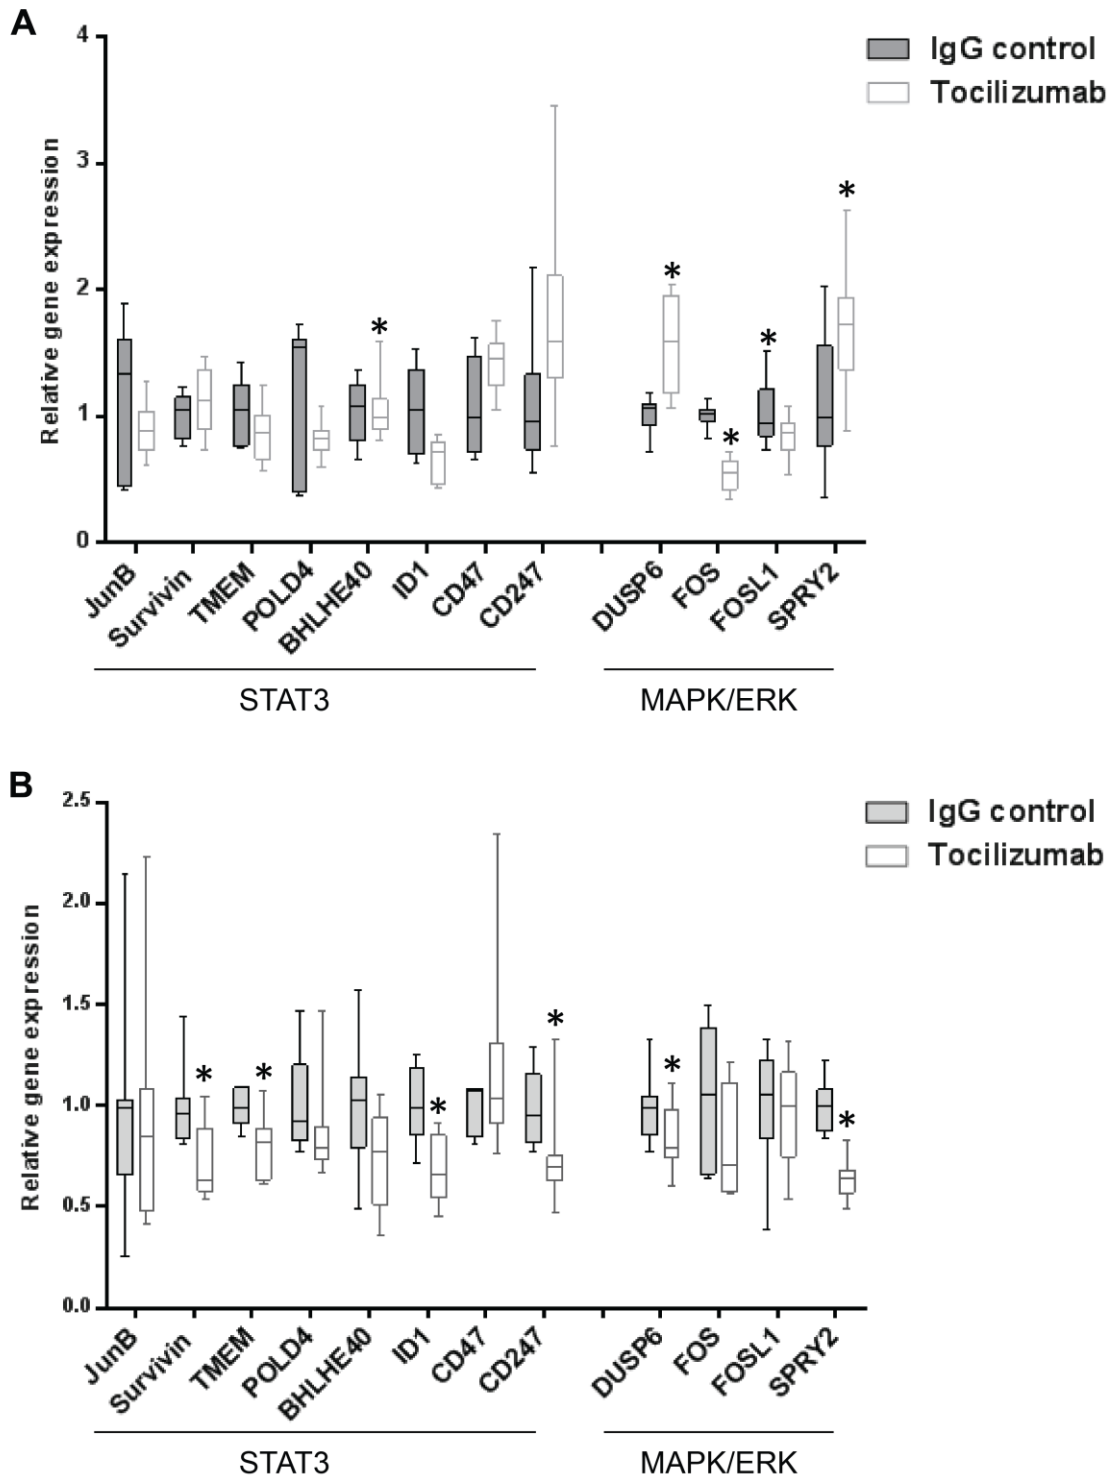

**Figure S12: Tocilizumab treatment results in decreased expression of STAT3 and MAPK/ERK1/2 target genes.** Related to Figure 6.

Changes in expression of select STAT3 and MAPK/ERK genes were assessed by qPCR analysis of mRNA from tocilizumab- or control IgG-treated tumor tissue. (A) LNT14 PDX model of HNSCC, n=3/control and 6/tocilizumab cohorts. (B) NCI-N87+PDF.G.P xenograft model of gastric cancer, n=7/cohort. \*Changes that were statistically significant by the linear mixed models test.

**Table S1: qPCR primer sequences.****Table S2: Cytokine array results.** Related to Figure 2.**Table S3: Antibodies used in IHC.**

| Antibody            | Vendor         | Cat. number | Ag retrieval | Dilution |
|---------------------|----------------|-------------|--------------|----------|
| IL-6                | Abcam          | ab6672      | pH6.0        | 1:600    |
| IL-6                | R&D            | MAB2061-SP  | pH6.0        | 1:100    |
| pSTAT3 (Y705)       | Cell Signaling | 9145        | pH9.0        | 1:100    |
| pERK1/2 (T202/Y204) | Cell Signaling | 4370        | pH6.0        | 1:100    |
| Ki-67               | Abcam          | ab16667     | pH6.0        | 1:500    |
| Cl. caspase 3       | Cell Signaling | 9661        | pH6.0        | 1:100    |

**Table S4A: Linear regression analysis of therapeutic study of tocilizumab in TE11+ESCC-CAF-J1 ESCC xenograft.** Related to Figure 4A.

| lnsize   | Coef.     | Std. Err. | z     | P> z         | [95% Conf. Interval] |           |
|----------|-----------|-----------|-------|--------------|----------------------|-----------|
| tx       |           |           |       |              |                      |           |
| toc      | -.2514668 | .1237806  | -2.03 | 0.042        | -.4940722            | -.0088614 |
| tx#c.day |           |           |       |              |                      |           |
| control  | .0415469  | .0073385  | 5.66  | <b>0.000</b> | .0271637             | .0559301  |
| toc      | .0221502  | .0072715  | 3.05  | <b>0.002</b> | .0078983             | .0364022  |
| _cons    | 3.999032  | .08869    | 45.09 | 0.000        | 3.825202             | 4.172861  |

**Table S4B: Linear regression analysis of therapeutic study of tocilizumab in TE11+ESCC-1-F ESCC xenograft.** Related to Figure 4A.

| size     | Coef.     | Std. Err. | z     | P> z         | [95% Conf. Interval] |          |
|----------|-----------|-----------|-------|--------------|----------------------|----------|
| tx       |           |           |       |              |                      |          |
| toc      | -1.197863 | 11.31737  | -0.11 | 0.916        | -23.37951            | 20.98378 |
| tx#c.day |           |           |       |              |                      |          |
| control  | 5.097738  | .9371529  | 5.44  | <b>0.000</b> | 3.260952             | 6.934523 |
| toc      | 1.66651   | .9317234  | 1.79  | <b>0.074</b> | -.1596342            | 3.492655 |
| _cons    | 40.8954   | 8.134156  | 5.03  | 0.000        | 24.95275             | 56.83806 |

**Table S4C: Linear regression analysis of therapeutic study of tocilizumab in TE11+FEF3303 ESCC xenograft.** Related to Figure S7A.

| size_ | Coef. | Std. Err. | z    | P> z   | [95% Conf. Interval] |       |
|-------|-------|-----------|------|--------|----------------------|-------|
| day   |       |           |      |        |                      |       |
| 6     | 0     | (base)    |      |        |                      |       |
| 8     | 21.99 | 11.78     | 1.87 | 0.0621 | -1.111               | 45.08 |
| 10    | 25.69 | 11.78     | 2.18 | 0.0293 | 2.59                 | 48.78 |
| 13    | 31.42 | 11.78     | 2.67 | 0.0077 | 8.32                 | 54.51 |
| 15    | 61.99 | 11.78     | 5.26 | 0.0000 | 38.89                | 85.08 |



|                |  |        |       |       |               |        |        |
|----------------|--|--------|-------|-------|---------------|--------|--------|
| 17             |  | 55.85  | 11.78 | 4.74  | 0.0000        | 32.75  | 78.94  |
| 20             |  | 71.84  | 11.78 | 6.10  | 0.0000        | 48.74  | 94.93  |
| 22             |  | 66.15  | 11.78 | 5.61  | 0.0000        | 43.05  | 89.24  |
| 24             |  | 89.89  | 11.78 | 7.63  | 0.0000        | 66.8   | 113    |
| 26             |  | 95.72  | 11.78 | 8.12  | 0.0000        | 72.63  | 118.8  |
|                |  |        |       |       |               |        |        |
| txx#day        |  |        |       |       |               |        |        |
| TOCILIZUMAB# 6 |  | 7.746  | 18.52 | 0.42  | 0.6758        | -28.56 | 44.05  |
| TOCILIZUMAB# 8 |  | -3.387 | 18.52 | -0.18 | 0.8549        | -39.69 | 32.91  |
| TOCILIZUMAB#10 |  | -16.58 | 18.22 | -0.91 | 0.3630        | -52.29 | 19.14  |
| TOCILIZUMAB#13 |  | -25.95 | 17.98 | -1.44 | 0.1489        | -61.2  | 9.288  |
| TOCILIZUMAB#15 |  | -58.42 | 17.98 | -3.25 | <b>0.0012</b> | -93.66 | -23.17 |
| TOCILIZUMAB#17 |  | -52.36 | 17.78 | -2.95 | <b>0.0032</b> | -87.21 | -17.52 |
| TOCILIZUMAB#20 |  | -57.79 | 17.78 | -3.25 | <b>0.0012</b> | -92.63 | -22.94 |
| TOCILIZUMAB#22 |  | -59.21 | 17.78 | -3.33 | <b>0.0009</b> | -94.06 | -24.37 |
| TOCILIZUMAB#24 |  | -74.05 | 17.78 | -4.17 | <b>0.0000</b> | -108.9 | -39.2  |
| TOCILIZUMAB#26 |  | -80.12 | 17.78 | -4.51 | <b>0.0000</b> | -115   | -45.27 |
|                |  |        |       |       |               |        |        |
| _cons          |  | 65.44  | 13.25 | 4.94  | 0.0000        | 39.47  | 91.41  |

**Table S4D: Linear regression analysis of therapeutic study of tocilizumab in EAC xenograft. Related to Figure 4A.**

| size_          |  | Coef.  | Std. Err. | z     | P> z          | [95% Conf. Interval] |
|----------------|--|--------|-----------|-------|---------------|----------------------|
| -----          |  |        |           |       |               |                      |
| day            |  |        |           |       |               |                      |
| 5              |  | 0      | (base)    |       |               |                      |
| 7              |  | 34.29  | 18.11     | 1.89  | 0.0583        | -1.201 69.79         |
| 10             |  | 84.18  | 18.11     | 4.65  | 0.0000        | 48.68 119.7          |
| 12             |  | 104.4  | 18.11     | 5.77  | 0.0000        | 68.95 139.9          |
| 14             |  | 113.6  | 18.11     | 6.27  | 0.0000        | 78.11 149.1          |
| 17             |  | 154.8  | 18.11     | 8.55  | 0.0000        | 119.3 190.3          |
| 19             |  | 174.6  | 18.11     | 9.64  | 0.0000        | 139.1 210            |
|                |  |        |           |       |               |                      |
| txx#day        |  |        |           |       |               |                      |
| TOCILIZUMAB# 5 |  | -12.96 | 43.92     | -0.30 | 0.7680        | -99.03 73.12         |
| TOCILIZUMAB# 7 |  | -17.99 | 43.68     | -0.41 | 0.6804        | -103.6 67.62         |
| TOCILIZUMAB#10 |  | -77.29 | 43.68     | -1.77 | 0.0768        | -162.9 8.316         |
| TOCILIZUMAB#12 |  | -94.57 | 43.68     | -2.17 | <b>0.0304</b> | -180.2 -8.963        |
| TOCILIZUMAB#14 |  | -97.86 | 43.68     | -2.24 | <b>0.0251</b> | -183.5 -12.25        |
| TOCILIZUMAB#17 |  | -106.3 | 43.68     | -2.43 | <b>0.0150</b> | -191.9 -20.68        |
| TOCILIZUMAB#19 |  | -108.2 | 43.68     | -2.48 | <b>0.0133</b> | -193.8 -22.58        |
|                |  |        |           |       |               |                      |
| _cons          |  | 73.26  | 30.89     | 2.37  | 0.0177        | 12.73 133.8          |

**Table S4E: Linear regression analysis of therapeutic study of tocilizumab in ESCC PDX. Related to Figure 4A.**

| size   |  | Coef. | Std. Err. | z     | P> z  | [95% Conf. Interval] |
|--------|--|-------|-----------|-------|-------|----------------------|
| -----  |  |       |           |       |       |                      |
| 1.tx   |  | -4.5  | 12.23702  | -0.37 | 0.713 | -28.48412 19.48412   |
|        |  |       |           |       |       |                      |
| daynum |  |       |           |       |       |                      |
| 3      |  | 1.25  | 9.479698  | 0.13  | 0.895 | -17.32987 19.82987   |
| 5      |  | 9.3   | 9.479698  | 0.98  | 0.327 | -9.279867 27.87987   |
| 8      |  | 9.3   | 9.479698  | 0.98  | 0.327 | -9.279867 27.87987   |

|           |  |         |          |       |       |           |          |
|-----------|--|---------|----------|-------|-------|-----------|----------|
| 10        |  | 32.05   | 9.479698 | 3.38  | 0.001 | 13.47013  | 50.62987 |
| 12        |  | 40.2    | 9.479698 | 4.24  | 0.000 | 21.62013  | 58.77987 |
| 15        |  | 54.15   | 9.479698 | 5.71  | 0.000 | 35.57013  | 72.72987 |
| 17        |  | 69.85   | 9.479698 | 7.37  | 0.000 | 51.27013  | 88.42987 |
| 19        |  | 86.8    | 9.479698 | 9.16  | 0.000 | 68.22013  | 105.3799 |
| 22        |  | 105.55  | 9.479698 | 11.13 | 0.000 | 86.97013  | 124.1299 |
| 24        |  | 125.4   | 9.479698 | 13.23 | 0.000 | 106.8201  | 143.9799 |
| 26        |  | 155.6   | 9.479698 | 16.41 | 0.000 | 137.0201  | 174.1799 |
| 29        |  | 193.35  | 9.479698 | 20.40 | 0.000 | 174.7701  | 211.9299 |
| tx#daynum |  |         |          |       |       |           |          |
| 1 3       |  | -2.05   | 13.40632 | -0.15 | 0.878 | -28.3259  | 24.2259  |
| 1 5       |  | -13.15  | 13.40632 | -0.98 | 0.327 | -39.4259  | 13.1259  |
| 1 8       |  | -22.95  | 13.40632 | -1.71 | 0.087 | -49.2259  | 3.3259   |
| 1 10      |  | -38.15  | 13.40632 | -2.85 | 0.004 | -64.4259  | -11.8741 |
| 1 12      |  | -41.8   | 13.40632 | -3.12 | 0.002 | -68.0759  | -15.5241 |
| 1 15      |  | -53.25  | 13.40632 | -3.97 | 0.000 | -79.5259  | -26.9741 |
| 1 17      |  | -67.7   | 13.40632 | -5.05 | 0.000 | -93.9759  | -41.4241 |
| 1 19      |  | -73.75  | 13.40632 | -5.50 | 0.000 | -100.0259 | -47.4741 |
| 1 22      |  | -87.95  | 13.40632 | -6.56 | 0.000 | -114.2259 | -61.6741 |
| 1 24      |  | -107.8  | 13.40632 | -8.04 | 0.000 | -134.0759 | -81.5241 |
| 1 26      |  | -116.05 | 13.40632 | -8.66 | 0.000 | -142.3259 | -89.7741 |
| 1 29      |  | -93.05  | 13.40632 | -6.94 | 0.000 | -119.3259 | -66.7741 |
| _cons     |  |         |          |       |       |           |          |
|           |  | 60.25   | 8.65288  | 6.96  | 0.000 | 43.29067  | 77.20933 |

**Table S4F: Linear regression analysis of therapeutic study of tocilizumab in ESCC PDX-1. Related to Figure S7A.**

| size      | Coef.   | Std. Err. | z     | P> z  | [95% Conf. Interval] |          |  |
|-----------|---------|-----------|-------|-------|----------------------|----------|--|
| 1.tx      | -4.5    | 12.23702  | -0.37 | 0.713 | -28.48412            | 19.48412 |  |
| daynum    |         |           |       |       |                      |          |  |
| 3         | 1.25    | 9.479698  | 0.13  | 0.895 | -17.32987            | 19.82987 |  |
| 5         | 9.3     | 9.479698  | 0.98  | 0.327 | -9.279867            | 27.87987 |  |
| 8         | 9.3     | 9.479698  | 0.98  | 0.327 | -9.279867            | 27.87987 |  |
| 10        | 32.05   | 9.479698  | 3.38  | 0.001 | 13.47013             | 50.62987 |  |
| 12        | 40.2    | 9.479698  | 4.24  | 0.000 | 21.62013             | 58.77987 |  |
| 15        | 54.15   | 9.479698  | 5.71  | 0.000 | 35.57013             | 72.72987 |  |
| 17        | 69.85   | 9.479698  | 7.37  | 0.000 | 51.27013             | 88.42987 |  |
| 19        | 86.8    | 9.479698  | 9.16  | 0.000 | 68.22013             | 105.3799 |  |
| 22        | 105.55  | 9.479698  | 11.13 | 0.000 | 86.97013             | 124.1299 |  |
| 24        | 125.4   | 9.479698  | 13.23 | 0.000 | 106.8201             | 143.9799 |  |
| 26        | 155.6   | 9.479698  | 16.41 | 0.000 | 137.0201             | 174.1799 |  |
| 29        | 193.35  | 9.479698  | 20.40 | 0.000 | 174.7701             | 211.9299 |  |
| tx#daynum |         |           |       |       |                      |          |  |
| 1 3       | -2.05   | 13.40632  | -0.15 | 0.878 | -28.3259             | 24.2259  |  |
| 1 5       | -13.15  | 13.40632  | -0.98 | 0.327 | -39.4259             | 13.1259  |  |
| 1 8       | -22.95  | 13.40632  | -1.71 | 0.087 | -49.2259             | 3.3259   |  |
| 1 10      | -38.15  | 13.40632  | -2.85 | 0.004 | -64.4259             | -11.8741 |  |
| 1 12      | -41.8   | 13.40632  | -3.12 | 0.002 | -68.0759             | -15.5241 |  |
| 1 15      | -53.25  | 13.40632  | -3.97 | 0.000 | -79.5259             | -26.9741 |  |
| 1 17      | -67.7   | 13.40632  | -5.05 | 0.000 | -93.9759             | -41.4241 |  |
| 1 19      | -73.75  | 13.40632  | -5.50 | 0.000 | -100.0259            | -47.4741 |  |
| 1 22      | -87.95  | 13.40632  | -6.56 | 0.000 | -114.2259            | -61.6741 |  |
| 1 24      | -107.8  | 13.40632  | -8.04 | 0.000 | -134.0759            | -81.5241 |  |
| 1 26      | -116.05 | 13.40632  | -8.66 | 0.000 | -142.3259            | -89.7741 |  |

|       |  |        |          |       |       |           |          |
|-------|--|--------|----------|-------|-------|-----------|----------|
| 1 29  |  | -93.05 | 13.40632 | -6.94 | 0.000 | -119.3259 | -66.7741 |
| _cons |  | 60.25  | 8.65288  | 6.96  | 0.000 | 43.29067  | 77.20933 |

**Table S5A: Linear regression analysis of therapeutic study of tocilizumab in HNSCC PDX. Related to Figure 6B.**

| size_          |  | Coef.  | Std. Err. | z      | P> z          | [95% Conf. Interval] |
|----------------|--|--------|-----------|--------|---------------|----------------------|
| day            |  |        |           |        |               |                      |
| 13             |  | 0      | (base)    |        |               |                      |
| 15             |  | 104.2  | 58.4      | 1.78   | 0.0745        | -10.31 218.6         |
| 18             |  | 268.6  | 58.4      | 4.60   | 0.0000        | 154.2 383.1          |
| 20             |  | 441.7  | 58.4      | 7.56   | 0.0000        | 327.2 556.2          |
| 22             |  | 577    | 58.4      | 9.88   | 0.0000        | 462.5 691.4          |
| 25             |  | 733.7  | 58.4      | 12.56  | 0.0000        | 619.2 848.2          |
| 27             |  | 866.2  | 58.4      | 14.83  | 0.0000        | 751.8 980.7          |
| 29             |  | 1064   | 58.4      | 18.22  | 0.0000        | 949.6 1179           |
| 32             |  | 1406   | 58.4      | 24.08  | 0.0000        | 1292 1521            |
| txx#day        |  |        |           |        |               |                      |
| TOCILIZUMAB#13 |  | -3.035 | 86.01     | -0.04  | 0.9719        | -171.6 165.5         |
| TOCILIZUMAB#15 |  | -77.4  | 86.01     | -0.90  | 0.3682        | -246 91.17           |
| TOCILIZUMAB#18 |  | -190.1 | 86.01     | -2.21  | <b>0.0271</b> | -358.7 -21.54        |
| TOCILIZUMAB#20 |  | -308.5 | 86.01     | -3.59  | <b>0.0003</b> | -477 -139.9          |
| TOCILIZUMAB#22 |  | -391.2 | 86.01     | -4.55  | <b>0.0000</b> | -559.8 -222.7        |
| TOCILIZUMAB#25 |  | -493.6 | 86.01     | -5.74  | <b>0.0000</b> | -662.2 -325          |
| TOCILIZUMAB#27 |  | -578.2 | 86.01     | -6.72  | <b>0.0000</b> | -746.8 -409.7        |
| TOCILIZUMAB#29 |  | -710.7 | 86.01     | -8.26  | <b>0.0000</b> | -879.3 -542.2        |
| TOCILIZUMAB#32 |  | -953.5 | 86.01     | -11.09 | <b>0.0000</b> | -1122 -785           |
| _cons          |  | 25.84  | 60.82     | 0.42   | 0.6710        | -93.36 145           |

**Table S5B: Linear regression analysis of therapeutic study of tocilizumab in gastric cancer xenograft. Related to Figure 6D.**

| size   |  | Coef. | Std. Err. | z     | P> z   | [95% Conf. Interval] |
|--------|--|-------|-----------|-------|--------|----------------------|
| day    |  |       |           |       |        |                      |
| 6      |  | 0     | (base)    |       |        |                      |
| 8      |  | 51.78 | 42.46     | 1.22  | 0.2226 | -31.43 135           |
| 10     |  | 96.71 | 42.46     | 2.28  | 0.0227 | 13.49 179.9          |
| 13     |  | 157.1 | 42.46     | 3.70  | 0.0002 | 73.89 240.3          |
| 15     |  | 207.9 | 42.46     | 4.90  | 0.0000 | 124.7 291.1          |
| 17     |  | 316.7 | 42.46     | 7.46  | 0.0000 | 233.5 399.9          |
| 20     |  | 403.9 | 42.46     | 9.51  | 0.0000 | 320.6 487.1          |
| 23     |  | 428.9 | 42.46     | 10.10 | 0.0000 | 345.7 512.1          |
| tx#day |  |       |           |       |        |                      |

|                |  |        |       |       |               |        |        |
|----------------|--|--------|-------|-------|---------------|--------|--------|
| tocilizumab# 8 |  | -15    | 59.1  | -0.25 | 0.7997        | -130.8 | 100.8  |
| tocilizumab#10 |  | -60.58 | 59.1  | -1.03 | 0.3054        | -176.4 | 55.26  |
| tocilizumab#13 |  | -69.03 | 58.42 | -1.18 | 0.2374        | -183.5 | 45.48  |
| tocilizumab#15 |  | -89.41 | 58.42 | -1.53 | 0.1259        | -203.9 | 25.1   |
| tocilizumab#17 |  | -151.5 | 58.42 | -2.59 | <b>0.0095</b> | -266   | -37.02 |
| tocilizumab#20 |  | -186.4 | 58.42 | -3.19 | <b>0.0014</b> | -301   | -71.93 |
| tocilizumab#23 |  | -209.1 | 58.42 | -3.58 | <b>0.0003</b> | -323.6 | -94.55 |
|                |  |        |       |       |               |        |        |
| _cons          |  | 88.01  | 47.42 | 1.86  | 0.0634        | -4.928 | 181    |

**Table S6A: Mixed effect linear mixed model regression analysis of expression of select STAT3 and ERK1/2 genes in HNSCC PDX tumors treated with tocilizumab or control human IgG. Related to Figure 6C.**

|     | gene     | pv              | chi2     |
|-----|----------|-----------------|----------|
| 1.  | BHLHE40  | .9301642        | .0076805 |
| 2.  | CD47     | .0674267        | 3.344579 |
| 3.  | DUSPY6   | <b>.0165673</b> | 5.741646 |
| 4.  | FOS      | <b>3.46e-10</b> | 39.39601 |
| 5.  | FOSL     | <b>.0079808</b> | 7.03777  |
| 6.  | ID1      | <b>.0221816</b> | 5.231485 |
| 7.  | JunB     | .3442537        | .8945261 |
| 8.  | PDL1     | .0722302        | 3.231598 |
| 9.  | PDL2     | .2611776        | 1.262504 |
| 10. | POLD4    | .1782313        | 1.812311 |
| 11. | SPRY2    | <b>.0231374</b> | 5.158157 |
| 12. | TMEM     | .2055054        | 1.60281  |
| 13. | survivin | .5158613        | .4221597 |

**Table S6B: Mixed effect linear mixed model regression analysis of expression of select STAT3 and ERK1/2 genes in gastric cancer xenograft tumors treated with tocilizumab or control human IgG. Related to Figure 6F.**

|  | gene     | pv              | chi2     |
|--|----------|-----------------|----------|
|  | BHLHE40  | .0697476        | 3.288951 |
|  | CD47     | .309842         | 1.031349 |
|  | DUSPY6   | <b>.0529207</b> | 3.746421 |
|  | FOS      | .2098802        | 1.572253 |
|  | FOSL     | .857074         | .0324361 |
|  | ID1      | <b>.000531</b>  | 12.00358 |
|  | JunB     | .8245311        | .0491602 |
|  | PDL1     | <b>.0259944</b> | 4.956394 |
|  | POLD4    | .3232606        | .9757084 |
|  | SPRY2    | <b>7.00e-10</b> | 38.02061 |
|  | TMEM     | <b>.0002402</b> | 13.48735 |
|  | survivin | <b>.0043027</b> | 8.151422 |
